# Supplementary material for: Human-mediated dispersal of Geniotrigona thoracica (Apidae: Meliponini) colonies promotes high genetic diversity and reduces population structuring in managed populations
Source: PeerJ. 2025 Dec 10;13:e20460. doi: 10.7717/peerj.20460 (PMC12701703; doi:10.7717/peerj.20460)
Supplement: Supplemental Information 1 — Locality with geographic coordinates, and GenBank accession numbers for specimens used in phylogenetic and haplotype network analyses [file peerj-13-20460-s001.xlsx]

## Sheet: Sheet1
No	New Sample-Code	Lat	Coordinate (Lat/Lon)	Date	16SrDNA	COI	Microsattelite
							TC3.302	TC4.287	A43	A113	B124
1	RATbk1	Bankha, Ratchaburi	13° 15' 27'' N 99° 24' 22'' E	28-5-2023	PV628640	PV628570	184/184	184/184	198/234	227/227	230/230
2	RATbk2	Bankha, Ratchaburi	13° 15' 27'' N 99° 24' 22'' E	28-5-2023	PV628641	PV628571	184/184	184/184	198/198	213/227	230/230
3	RATbk3	Bankha, Ratchaburi	13° 15' 27'' N 99° 24' 22'' E	28-5-2023	PV628642	PV628572	184/184	184/184	198/234	227/227	230/230
4	RATcb1	Chombueng, Ratchaburi	13° 37' 43'' N 99° 35' 06'' E	29-5-2023	PV628643	PV628573	184/184	184/184	232/232	213/227	232/232
5	RATcb2	Chombueng, Ratchaburi	13° 37' 43'' N 99° 35' 06'' E	29-5-2023	PV628644	PV628574	184/184	184/184	198/198	213/217	232/232
6	RATcb3	Chombueng, Ratchaburi	13° 37' 43'' N 99° 35' 06'' E	29-5-2023	PV628645	PV628575	182/184	184/202	188/194	213/213	230/232
7	RATcb4	Chombueng, Ratchaburi	13° 40' 41'' N 99° 35' 03'' E	29-5-2023	PV628646	PV628576	184/184	178/184	198/234	213/213	230/232
8	CHUMmu1	Muang, Chumporn	10° 29' 51'' N 98° 59' 16''E	15-10-2024	PV628595	PV628525	184/184	184/184	198/234	213/227	230/232
9	CHUMmu2	Muang, Chumporn	10° 29' 51'' N 98° 59' 16''E	15-10-2024	PV628596	PV628526	184/184	184/202	198/232	213/227	230/232
10	CHUMsw1	Sawi, Chumporn	10° 16' 53'' N 99° 01' 59'' E	30-10-2024	PV628597	PV628527	182/184	184/184	230/230	213/227	230/232
11	CHUMsw2	Sawi, Chumporn	10° 16' 53'' N 99° 01' 59'' E	30-10-2024	PV628598	PV628528	184/184	184/202	230/230	213/227	230/232
12	CHUMsw3	Sawi, Chumporn	10° 16' 53'' N 99° 01' 59'' E	30-10-2024	PV628599	PV628529	200/202	200/202	230/234	213/227	230/232
13	CHUMsw4	Sawi, Chumporn	10° 16' 05'' N 99° 03' 25'' E	30-10-2024	PV628600	PV628530	182/184	184/202	234/234	213/213	232/232
14	CHUMsw5	Sawi, Chumporn	10° 16' 05'' N 99° 03' 25'' E	30-10-2024	PV628601	PV628531	184/184	184/202	230/230	213/213	230/232
15	SONGky1	Kohyor, Songkhla	07° 10' 13'' N 100° 32' 29'' E	30-5-2023	PV628647	PV628577	182/184	184/200	198/198	213/213	232/232
16	SONGky2	Kohyor, Songkhla	07° 10' 13'' N 100° 32' 29'' E	30-5-2023	PV628648	PV628578	184/202	184/202	232/232	213/227	230/232
17	SONGmu1	Muang, Songkhla	07° 06' 01'' N 100° 36' 16'' E	26-09-2024	PV628649	PV628579	184/202	184/200	234/234	213/227	232/232
18	SONGmu2	Muang, Songkhla	07° 06' 01'' N 100° 36' 16'' E	26-09-2024	PV628651	PV628581	184/202	184/202	232/234	216/227	232/232
19	SONGmu3	Muang, Songkhla	07° 06' 01'' N 100° 36' 16'' E	26-09-2024	PV628652	PV628582	182/184	184/202	232/234	213/213	232/232
20	SONGmu4	Muang, Songkhla	07° 06' 01'' N 100° 36' 16'' E	26-09-2024	PV628653	PV628583	182/184	184/202	232/234	213/227	230/232
21	SONGmu5	Muang, Songkhla	07° 06' 01'' N 100° 36' 16'' E	26-09-2024	PV628654	PV628584	184/184	184/202	230/234	213/227	230/230
22	SONGmu6	Muang, Songkhla	07° 06' 01'' N 100° 36' 16'' E	26-09-2024	PV628655	PV628585	182/184	184/200	230/234	213/213	230/230
23	SONGmu7	Muang, Songkhla	07° 06' 01'' N 100° 36' 16'' E	26-09-2024	PV628656	PV628586	184/184	184/202	230/234	213/213	228/232
24	SONGmu8	Muang, Songkhla	07° 03' 50'' N 100° 32' 10'' E	26-09-2024	PV628657	PV628587	198/200	198/200	230/230	213/213	230/232
25	SONGmu9	Muang, Songkhla	07° 03' 50'' N 100° 32' 10'' E	26-09-2024	PV628658	PV628588	184/184	184/208	230/234	213/227	232/232
26	SONGmu10	Muang, Songkhla	07° 03' 50'' N 100° 32' 10'' E	26-09-2024	PV628650	PV628580	184/184	184/202	234/234	213/213	230/230
27	PHATtm1	Tamod, Phattalung	07° 16' 56'' N 100° 02' 17'' E	16-10-2024	PV628635	PV628565	182/184	184/184	230/234	213/213	232/232
28	PHATtm2	Tamod, Phattalung	07° 16' 56'' N 100° 02' 17'' E	16-10-2024	PV628636	PV628566	182/184	184/202	230/234	213/227	230/232
29	PHATtm3	Tamod, Phattalung	07° 16' 56'' N 100° 02' 17'' E	16-10-2024	PV628637	PV628567	184/184	184/202	232/232	213/213	230/232
30	PHATtm4	Tamod, Phattalung	07° 16' 56'' N 100° 02' 17'' E	16-10-2024	PV628638	PV628568	184/202	184/202	198/230	213/227	230/230
31	PHATtm5	Tamod, Phattalung	07° 16' 56'' N 100° 02' 17'' E	16-10-2024	PV628639	PV628569	184/184	184/202	230/230	213/213	230/234
32	YALArm1	Raman, Yala	06° 28' 27'' N 101° 24' 42'' E	25-10-2024	PV628659	PV628589	186/202	186/202	232/232	213/213	232/232
33	YALArm2	Raman, Yala	06° 28' 27'' N 101° 24' 42'' E	25-10-2024	PV628660	PV628590	184/184	184/202	234/234	213/227	232/232
34	YALArm3	Raman, Yala	06° 28' 27'' N 101° 24' 42'' E	25-10-2024	PV628661	PV628591	184/184	184/200	230/230	213/227	232/232
35	YALArm4	Raman, Yala	06° 29' 54'' N 101° 29' 45'' E	2024-02-06	PV628662	PV628592	192/194	194/200	230/232	213/227	232/232
36	YALArm5	Raman, Yala	06° 29' 54'' N 101° 29' 45'' E	2024-02-06	PV628663	PV628593	200/202	202/202	230/230	213/227	230/230
37	YALArm6	Raman, Yala	06° 29' 54'' N 101° 29' 45'' E	2024-02-06	PV628664	PV628594	184/186	184/184	234/234	213/227	230/230
38	PATAkp1	Kapho, Pattani	06° 35' 05'' N 101° 33' 05'' E	20-10-2024	PV628623	PV628553	184/184	184/184	230/234	213/213	230/232
39	PATAkp2	Kapho, Pattani	06° 35' 05'' N 101° 33' 05'' E	20-10-2024	PV628624	PV628554	200/202	184/200	230/234	213/213	230/230
40	PATAkp3	Kapho, Pattani	06° 35' 05'' N 101° 33' 05'' E	20-10-2024	PV628625	PV628555	184/202	184/202	230/234	213/227	230/232
41	PATAkp4	Kapho, Pattani	06° 35' 05'' N 101° 33' 05'' E	20-10-2024	PV628626	PV628556	202/202	202/202	234/234	213/227	232/232
42	PATAkp5	Kapho, Pattani	06° 35' 05'' N 101° 33' 05'' E	20-10-2024	PV628627	PV628557	184/184	184/184	230/234	213/213	230/232
43	PATAkp6	Kapho, Pattani	06° 35' 05'' N 101° 33' 05'' E	20-10-2024	PV628628	PV628558	184/200	184/202	230/234	213/213	230/230
44	PATAsb1	Saiburi, Pattani	06° 38' 10'' N 101° 35' 33'' E	20-10-2024	PV628629	PV628559	184/184	184/202	234/234	213/213	232/232
45	PATAsb2	Saiburi, Pattani	06° 38' 10'' N 101° 35' 33'' E	20-10-2024	PV628630	PV628560	202/202	202/208	234/234	213/213	228/230
46	PATAsb3	Saiburi, Pattani	06° 40' 51'' N 101° 35' 11'' E	20-10-2024	PV628631	PV628561	184/184	184/184	234/234	213/213	230/230
47	PATAsb4	Saiburi, Pattani	06° 40' 51'' N 101° 35' 11'' E	20-10-2024	PV628632	PV628562	184/184	184/184	232/234	227/227	230/232
48	PATAsb5	Saiburi, Pattani	06° 40' 51'' N 101° 35' 11'' E	20-10-2024	No	No	184/202	184/202	232/234	213/213	230/232
49	PATAsb6	Saiburi, Pattani	06° 40' 51'' N 101° 35' 11'' E	20-10-2024	PV628633	PV628563	184/184	184/208	230/234	213/213	230/232
50	PATAsb7	Saiburi, Pattani	06° 40' 51'' N 101° 35' 11'' E	20-10-2024	PV628634	PV628564	184/184	184/208	230/230	213/221	228/232
51	NARAyn1	Yi-ngo, Narathiwat	06° 23' 32'' N 101° 41' 46'' E	17-10-2023	PV628616	PV628546	184/202	184/202	198/230	213/227	230/230
52	NARAyn2	Yi-ngo, Narathiwat	06° 23' 32'' N 101° 41' 46'' E	17-10-2023	PV628617	PV628547	202/202	200/202	198/198	213/227	230/232
53	NARAyn3	Yi-ngo, Narathiwat	06° 23' 32'' N 101° 41' 46'' E	17-10-2023	PV628618	PV628548	184/202	184/202	198/230	213/227	230/230
54	NARAyn4	Yi-ngo, Narathiwat	06° 23' 32'' N 101° 41' 46'' E	17-10-2023	PV628619	PV628549	184/202	184/202	198/230	213/213	230/232
55	NARAyn5	Yi-ngo, Narathiwat	06° 23' 32'' N 101° 41' 46'' E	17-10-2023	PV628620	PV628550	184/184	184/202	230/230	213/213	230/234
56	NARAyn6	Yi-ngo, Narathiwat	06° 23' 32'' N 101° 41' 46'' E	17-10-2023	PV628621	PV628551	182/184	184/184	230/230	213/213	230/230
57	NARAyn7	Yi-ngo, Narathiwat	06° 23' 32'' N 101° 41' 46'' E	17-10-2023	PV628622	PV628552	184/184	200/202	230/230	213/213	230/232
58	NARAmu1	Muang, Narathiwat	06° 20' 06'' N 101° 46' 50'' E	20-10-2024	PV628602	PV628532	184/184	192/202	230/232	213/213	230/232
59	NARAmu2	Muang, Narathiwat	06° 20' 06'' N 101° 46' 50'' E	20-10-2024	PV628603	PV628533	202/202	202/202	234/232	213/213	232/232
60	NARAmu3	Muang, Narathiwat	06° 20' 06'' N 101° 46' 50'' E	20-10-2024	PV628604	PV628534	184/184	184/202	230/232	213/227	228/232
61	NARAwe1	Weang, Narathiwat	05° 53' 41'' N 101° 53' 03'' E	18-10-2023	No	No	182/186	184/184	230/230	213/213	230/234
62	NARAwe2	Weang, Narathiwat	05° 53' 41'' N 101° 53' 03'' E	18-10-2023	PV628609	PV628539	182/186	184/184	230/230	213/213	230/234
63	NARAwe3	Weang, Narathiwat	05° 53' 41'' N 101° 53' 03'' E	18-10-2023	PV628610	PV628540	184/186	184/202	230/230	213/213	230/234
64	NARAwe4	Weang, Narathiwat	05° 53' 41'' N 101° 53' 03'' E	18-10-2023	No	No	184/186	184/194	232/232	213/227	232/232
65	NARAwe5	Weang, Narathiwat	05° 53' 43'' N 101° 53' 33'' E	2024-01-06	PV628611	PV628541	184/186	184/194	232/232	213/227	232/232
66	NARAwe6	Weang, Narathiwat	05° 53' 43'' N 101° 53' 33'' E	2024-01-06	PV628612	PV628542	184/202	202/202	230/232	213/227	230/232
67	NARAwe7	Weang, Narathiwat	05° 53' 43'' N 101° 53' 33'' E	2024-01-06	PV628613	PV628543	202/202	184/202	232/232	213/221	230/232
68	NARAwe8	Weang, Narathiwat	05° 53' 43'' N 101° 53' 33'' E	2024-01-06	PV628614	PV628544	184/184	182/184	230/230	213/227	228/228
69	NARAwe9	Weang, Narathiwat	05° 53' 43'' N 101° 53' 33'' E	2024-01-06	PV628615	PV628545	184/184	184/200	232/232	213/227	232/232
70	NARAsk1	Sukhirin, Narathiwat	05° 57' 28'' N 101° 42' 37'' E	20-10-2024	PV628605	PV628535	184//184	184/184	230/234	213/227	232/232
71	NARAsk2	Sukhirin, Narathiwat	05° 57' 28'' N 101° 42' 37'' E	20-10-2024	PV628606	PV628536	192/202	202/202	232/234	213/227	230/232
72	NARAsk3	Sukhirin, Narathiwat	05° 57' 28'' N 101° 42' 37'' E	20-10-2024	PV628607	PV628537	184/184	184/184	230/234	213/227	228/230
73	NARAsk4	Sukhirin, Narathiwat	05° 57' 28'' N 101° 42' 37'' E	20-10-2024	PV628608	PV628538	202/202	194/202	230/234	213/213	230/232
